# Supplementary material for: Drivers Are More Physically Active Than Non-Drivers in Older Adults
Source: MDPI journal article supplement (doi:10.3390/ijerph15061094), 2018-05-28
Supplement: s1 [file s1]

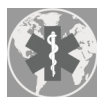

## Supplementary Tables

**S1. Comparisons of objectively measured sedentary time (min/day) by driving status**

| Independent variables | Total SB |                |                  | ≥ 30-min SB |                |              | ≥ 60-min SB |                |              |
|-----------------------|----------|----------------|------------------|-------------|----------------|--------------|-------------|----------------|--------------|
|                       | EM       | (95% CI)       | P-value          | EM          | (95% CI)       | P-value      | EM          | (95% CI)       | P-value      |
| Driving status        |          |                | <b>&lt;0.001</b> |             |                | <b>0.003</b> |             |                | <b>0.002</b> |
| Frequently            | 500.5    | (486.5, 514.5) |                  | 205.1       | (191.4, 220.3) |              | 87.9        | (78.7, 97.9)   |              |
| Rarely                | 539.3    | (517.1, 561.6) |                  | 247.2       | (220.8, 276.1) |              | 125.9       | (105.4, 150.3) |              |
| No driver's license   | 544.8    | (529.2, 560.3) |                  | 247.2       | (229.1, 267.3) |              | 111.2       | (98.4, 125.3)  |              |

Estimated mean was adjusted for wear time, age, sex, residential area, working status, living arrangement, body mass index, self-rated health, and physical limitation.  
Abbreviations; SB: sedentary behavior, EM: estimated mean, CI: confidence interval. Bold indicates statistical significance (P<0.05).

**S2. Comparisons of objectively measured physical activity time (min/day) by driving status**

| Independent variables | LPA   |                |              | Total MVPA |              |              | Short-bout MVPA |              |                  | Long-bout MVPA |             |         | Total PA (LPA + MVPA) |                |                  |
|-----------------------|-------|----------------|--------------|------------|--------------|--------------|-----------------|--------------|------------------|----------------|-------------|---------|-----------------------|----------------|------------------|
|                       | EM    | (95% CI)       | P-value      | EM         | (95% CI)     | P-value      | EM              | (95% CI)     | P-value          | EM             | (95% CI)    | P-value | EM                    | (95% CI)       | P-value          |
| Driving status        |       |                | <b>0.001</b> |            |              | <b>0.001</b> |                 |              | <b>&lt;0.001</b> |                |             | 0.774   |                       |                | <b>&lt;0.001</b> |
| Frequently            | 324.7 | (312.7, 336.8) |              | 37.8       | (33.3, 43.0) |              | 25.8            | (23.1, 28.8) |                  | 11.1           | (9.2, 13.3) |         | 373.5                 | (359.5, 387.5) |                  |
| Rarely                | 284.4 | (265.3, 303.6) |              | 38.5       | (31.4, 47.1) |              | 24.6            | (20.6, 29.4) |                  | 12.6           | (9.5, 16.8) |         | 334.6                 | (312.4, 356.9) |                  |
| No driver's license   | 291.3 | (277.9, 304.7) |              | 26.7       | (23.2, 30.8) |              | 17.9            | (15.8, 20.3) |                  | 11.8           | (9.4, 14.7) |         | 329.2                 | (313.6, 344.8) |                  |

Estimated mean was adjusted for wear time, age, sex, residential area, working status, living arrangement, body mass index, self-rated health, and physical limitation.  
Abbreviations; LPA: light-intensity physical activity, MVPA: moderate-to-vigorous physical activity, PA: physical activity, EM: estimated mean, CI: confidence interval.  
Short-bout: lasting <10 minutes, long-bout: lasting ≥10 minutes. Bold indicates statistical significance (P<0.05).

**S3. Comparisons of objectively measured sedentary time (min/day) by physical limitation status.**

| Independent variables | Total SB |                |          |                  | ≥ 30-min SB |                |          |                  | ≥ 60-min SB |                |          |              |
|-----------------------|----------|----------------|----------|------------------|-------------|----------------|----------|------------------|-------------|----------------|----------|--------------|
|                       | EM       | (95% CI)       | $\eta^2$ | P-value          | EM          | (95% CI)       | $\eta^2$ | P-value          | EM          | (95% CI)       | $\eta^2$ | P-value      |
| Not at all            |          |                | 0.006    | 0.216            |             |                | 0.003    | 0.397            |             |                | 0.005    | 0.276        |
| Drivers               | 513.3    | (496.1, 530.5) |          |                  | 219.8       | (202.3, 239.3) |          |                  | 96.6        | (84.5, 110.4)  |          |              |
| Non-drivers           | 530.5    | (513.1, 547.8) |          |                  | 232.8       | (214.3, 253.5) |          |                  | 108.6       | (94.8, 124.2)  |          |              |
| With any limitation   |          |                | 0.091    | <b>&lt;0.001</b> |             |                | 0.076    | <b>&lt;0.001</b> |             |                | 0.064    | <b>0.001</b> |
| Drivers               | 482.8    | (459.3, 506.3) |          |                  | 187.9       | (167.1, 210.9) |          |                  | 76.7        | (64.1, 92.0)   |          |              |
| Non-drivers           | 554.5    | (534.9, 574.2) |          |                  | 259.4       | (235.5, 286.4) |          |                  | 121.1       | (104.0, 140.9) |          |              |

Estimated mean was adjusted for wear time, age, sex, residential area, working status, living arrangement, body mass index, and self-rated health. Abbreviations; SB: sedentary behavior, EM: estimated mean, CI: confidence interval. Bold indicates statistical significance ( $P < 0.05$ ).

**S4. Comparisons of objectively measured physical activity time (min/day) by physical limitation status.**

| Independent variables | LPA   |                |          |                  | Total MVPA |              |          |              | Short-bout MVPA |              |          |                  | Long-bout MVPA |              |          |         | Total PA (LPA + MVPA) |                |          |                  |
|-----------------------|-------|----------------|----------|------------------|------------|--------------|----------|--------------|-----------------|--------------|----------|------------------|----------------|--------------|----------|---------|-----------------------|----------------|----------|------------------|
|                       | EM    | (95% CI)       | $\eta^2$ | P-value          | EM         | (95% CI)     | $\eta^2$ | P-value      | EM              | (95% CI)     | $\eta^2$ | P-value          | EM             | (95% CI)     | $\eta^2$ | P-value | EM                    | (95% CI)       | $\eta^2$ | P-value          |
| Not at all            |       |                | 0.007    | 0.187            |            |              | 0.001    | 0.641        |                 |              | 0.001    | 0.681            |                |              | <0.001   | 0.986   |                       |                | 0.006    | 0.216            |
| Drivers               | 313.2 | (298.5, 327.8) |          |                  | 41.0       | (35.5, 47.5) |          |              | 25.8            | (22.6, 29.4) |          |                  | 13.1           | (10.4, 16.6) |          |         | 364.5                 | (347.3, 381.7) |          |                  |
| Non-drivers           | 297.6 | (282.8, 312.4) |          |                  | 38.8       | (33.5, 45.0) |          |              | 24.7            | (21.7, 28.2) |          |                  | 13.2           | (10.4, 16.7) |          |         | 347.4                 | (330.0, 364.7) |          |                  |
| With any limitation   |       |                | 0.081    | <b>&lt;0.001</b> |            |              | 0.044    | <b>0.005</b> |                 |              | 0.072    | <b>&lt;0.001</b> |                |              | 0.004    | 0.465   |                       |                | 0.091    | <b>&lt;0.001</b> |
| Drivers               | 340.0 | (319.7, 360.4) |          |                  | 34.3       | (27.4, 42.9) |          |              | 25.8            | (21.2, 31.4) |          |                  | 8.6            | (6.5, 11.5)  |          |         | 385.3                 | (361.8, 408.8) |          |                  |

|                 |           |                   |          |                 |          |                 |          |                |           |                       |
|-----------------|-----------|-------------------|----------|-----------------|----------|-----------------|----------|----------------|-----------|-----------------------|
| Non-<br>drivers | 281.<br>8 | (264.7,<br>298.8) | 21.<br>6 | (17.9,<br>26.0) | 15.<br>2 | (12.9,<br>18.0) | 10.<br>1 | (7.8,<br>13.1) | 313.<br>5 | (293.9<br>,<br>333.2) |
|-----------------|-----------|-------------------|----------|-----------------|----------|-----------------|----------|----------------|-----------|-----------------------|

Estimated mean was adjusted for wear time, age, sex, residential area, working status, living arrangement, body mass index, and self-rated health. Abbreviations; LPA: light-intensity physical activity, MVPA: moderate-to-vigorous physical activity, PA: physical activity, EM: estimated mean, CI: confidence interval. Short-bout: lasting <10 minutes, long-bout: lasting  $\geq 10$  minutes. Bold indicates statistical significance ( $P < 0.05$ ).

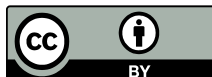

© 2018 by the authors. Submitted for possible open access publication under the terms and conditions of the Creative Commons Attribution (CC BY) license (<http://creativecommons.org/licenses/by/4.0/>).
